# Supplementary material for: Survival Impact of Chronic Obstructive Pulmonary Disease or Acute Exacerbation on Patients with Rectal Adenocarcinoma Undergoing Curative Resection: A Propensity Score-Matched, Population-Based Cohort Study
Source: MDPI journal article supplement (doi:10.3390/cancers13164221), 2021-08-22
Supplement: s1 [file s1]

**Table S1.** Characteristics of patients with rectal adenocarcinoma with or without smoking-related chronic obstructive pulmonary disease before surgery before propensity score matching.

|                                            | Non-COPD patients |        | COPD patients  |        | P-value |
|--------------------------------------------|-------------------|--------|----------------|--------|---------|
|                                            | N = 2,261         | (100%) | N = 322        | (100%) |         |
| Age (mean ± SD)                            | (69.26±13.12)     |        | (71.51 ± 9.72) |        | <0.001  |
| Age (years)                                |                   |        |                |        | <0.001  |
| ≤65                                        | 1,213             | 53.65% | 74             | 22.98% |         |
| 65–75                                      | 593               | 26.23% | 109            | 33.85% |         |
| 75–85                                      | 379               | 16.76% | 110            | 34.16% |         |
| >85                                        | 76                | 3.36%  | 29             | 9.00%  |         |
| Sex                                        |                   |        |                |        | <0.001  |
| Female                                     | 952               | 42.11% | 99             | 30.75% |         |
| Male                                       | 1,309             | 57.89% | 223            | 69.25% |         |
| Diabetes                                   |                   |        |                |        | <0.001  |
| No                                         | 1,816             | 80.32% | 220            | 68.32% |         |
| Yes                                        | 445               | 19.68% | 102            | 31.68% |         |
| Hyperlipidemia                             |                   |        |                |        | 0.073   |
| No                                         | 1,795             | 79.39% | 241            | 74.84% |         |
| Yes                                        | 466               | 20.61% | 81             | 25.16% |         |
| Hypertension                               |                   |        |                |        | 0.069   |
| No                                         | 2,125             | 93.98% | 292            | 90.68% |         |
| Yes                                        | 136               | 6.02%  | 30             | 9.32%  |         |
| CKD                                        |                   |        |                |        | 0.095   |
| No                                         | 2,244             | 99.25% | 316            | 98.14% |         |
| Yes                                        | 17                | 0.75%  | 6              | 1.86%  |         |
| Cardiovascular diseases                    |                   |        |                |        | <0.001  |
| No                                         | 2,128             | 94.12% | 273            | 84.78% |         |
| Yes                                        | 133               | 5.88%  | 49             | 15.22% |         |
| CCI score                                  |                   |        |                |        | <0.001  |
| 0                                          | 1,978             | 87.48% | 200            | 62.11% |         |
| ≥1                                         | 283               | 12.52% | 122            | 37.89% |         |
| AJCC pathologic stages                     |                   |        |                |        | 0.809   |
| I                                          | 111               | 4.91%  | 16             | 4.97%  |         |
| II                                         | 626               | 27.69% | 90             | 27.95% |         |
| IIIA                                       | 621               | 27.47% | 87             | 27.02% |         |
| IIIB                                       | 746               | 33.99% | 106            | 32.92% |         |
| IIIC                                       | 157               | 6.94%  | 23             | 7.14%  |         |
| Grade of differentiation                   |                   |        |                |        | 0.087   |
| Low                                        | 701               | 31.01% | 107            | 33.23% |         |
| Moderate                                   | 1,105             | 48.87% | 154            | 47.83% |         |
| High                                       | 455               | 20.12% | 61             | 18.94% |         |
| Lymphovascular invasion                    |                   |        |                |        | 0.071   |
| No                                         | 1,425             | 63.01% | 196            | 60.87% |         |
| Yes                                        | 836               | 36.99% | 126            | 39.13% |         |
| Perineural invasion                        |                   |        |                |        | 0.677   |
| No                                         | 1,538             | 68.02% | 223            | 69.25% |         |
| Yes                                        | 723               | 31.98% | 99             | 30.75% |         |
| Margin (distal and circumferential margin) |                   |        |                |        | 0.112   |
| Negative                                   | 2,176             | 96.24% | 308            | 95.65% |         |
| Positive                                   | 85                | 3.76%  | 14             | 4.35%  |         |
| Neoadjuvant CCRT                           |                   |        |                |        | 0.677   |
| No                                         | 1,086             | 48.03% | 160            | 49.69% |         |
| Yes                                        | 1,175             | 51.97% | 162            | 50.31% |         |
| Adjuvant chemotherapy                      |                   |        |                |        | 0.346   |
| No                                         | 1,018             | 45.02% | 149            | 46.63% |         |
| Yes                                        | 1,243             | 54.98% | 173            | 53.73% |         |

|                                                                        |                   |         |                   |        |        |
|------------------------------------------------------------------------|-------------------|---------|-------------------|--------|--------|
| Incomes Levels                                                         |                   |         |                   |        | <0.001 |
| Low (< 20000 NTD\$)                                                    | 1,198             | 52.99%  | 168               | 52.17% |        |
| Middle (20000-30000 NTD\$)                                             | 565               | 24.99%  | 116               | 36.02% |        |
| High (>30000 NTD\$)                                                    | 498               | 22.02%  | 38                | 11.81% |        |
| Frequency of Hospitalizations for COPDAE (1 year before rectal cancer) |                   |         |                   |        | <0.001 |
| 0                                                                      | 2,261             | 100.00% | 206               | 63.98% |        |
| 1                                                                      | 0                 | 0.00%   | 59                | 18.32% |        |
| ≥2                                                                     | 0                 | 0.00%   | 57                | 17.70% |        |
| Follow up (Death)                                                      |                   |         |                   |        | <0.001 |
| Years, Median (IQR, Q1, Q3)                                            | 4.43 (1.74, 6.14) |         | 3.40 (1.11, 5.53) |        |        |
| Follow up (Death)                                                      |                   |         |                   |        | <0.001 |
| Years, (mean ± SD)                                                     | 4.82 ± 3.85       |         | 3.95 ± 3.45       |        |        |
| Death                                                                  |                   |         |                   |        | 0.013  |
| No                                                                     | 1,175             | 51.97%  | 148               | 45.96% |        |
| Yes                                                                    | 1,086             | 48.03%  | 174               | 54.04% |        |

IQR, interquartile range; SD, standard deviation; AJCC, American Joint Committee on Cancer; CCI, Charlson comorbidity index; COPD, chronic obstructive pulmonary disease; COPDAE, COPD with acute exacerbation; CCRT, concurrent chemoradiotherapy; CKD, chronic kidney disease; NTD\$, New Taiwan Dollar.

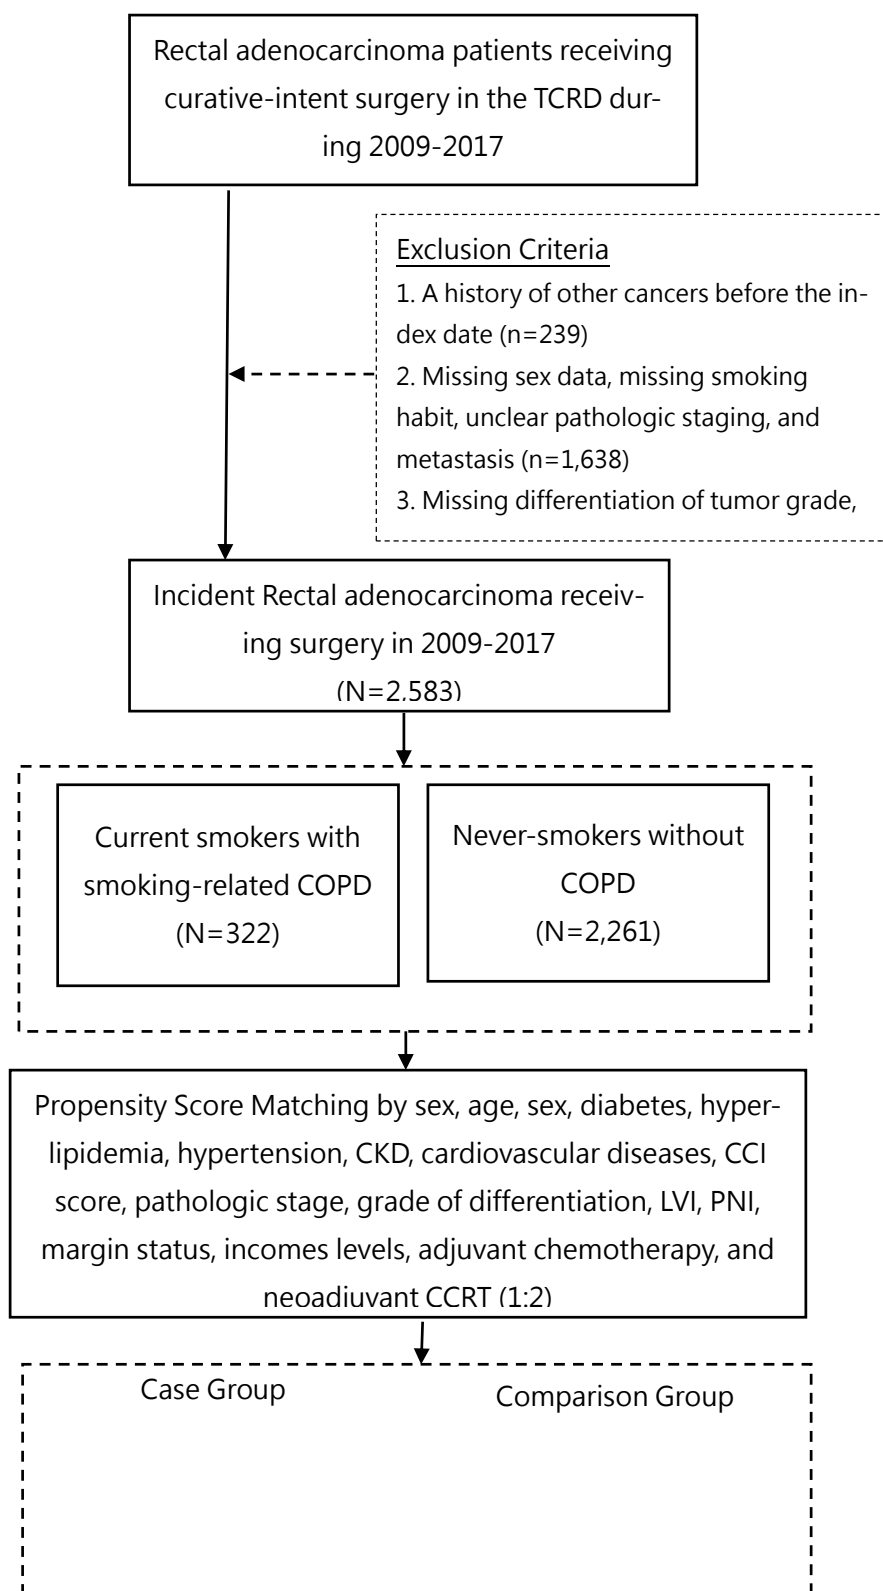

**Figure S1.** Flow-chart of patient selection.
